# Supplementary material for: Formation of a new class of 7π radicals via sterically induced P–P bond cleavage of the dimers [(CH)2(NR)2P]2
Source: Royal Society of Chemistry journal article supplement (doi:10.1039/b821241d), 2009-01-01
Supplement: b821241d.pdf [file b821241d.pdf]

## Supplementary Information

### EPR spectroscopy

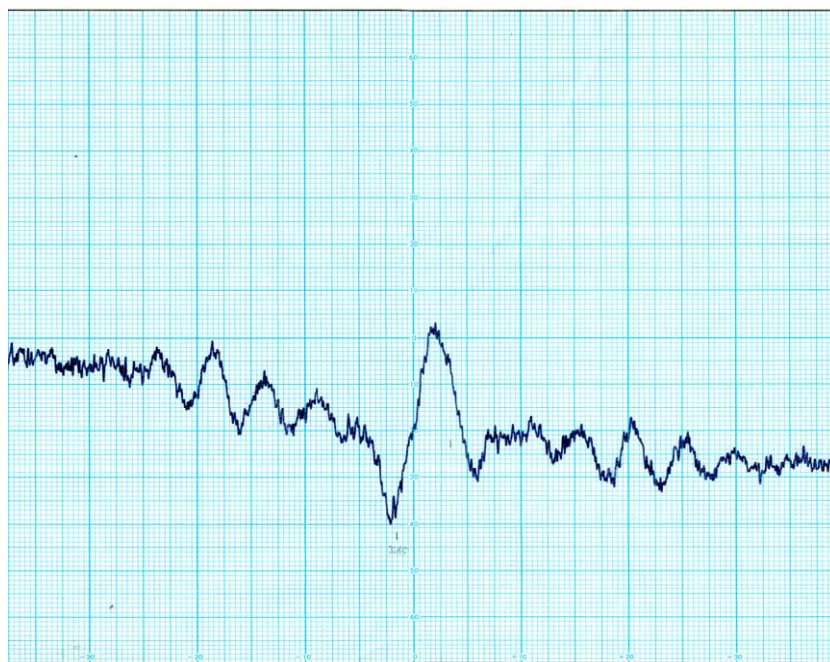

**Figure ESI 1.** EPR spectrum of **1b** at 315 K in thf.

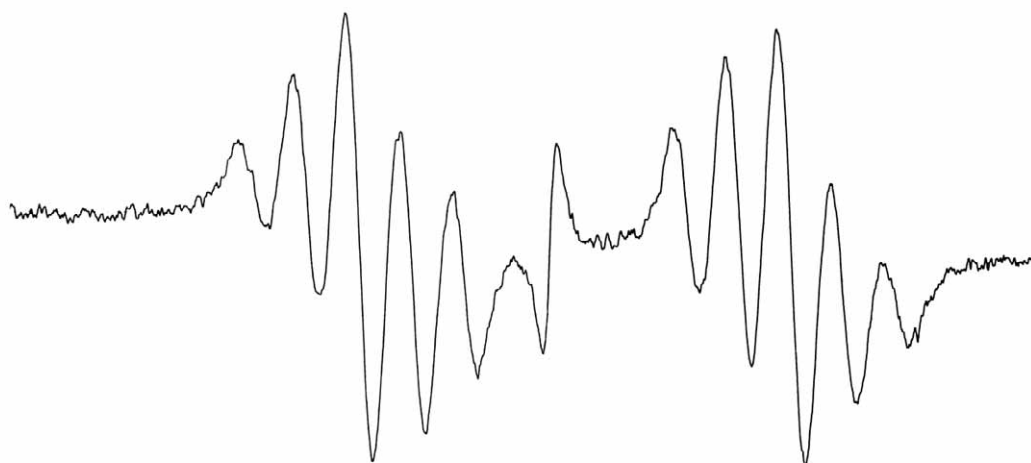

**Figure ESI 2.** EPR spectrum of **1c** at room temperature in thf.

## DFT calculations

All DFT calculations were undertaken using GAMESS-UK using the unrestricted Hartree-Fock UB3LYP functional with double zeta 6-31G, 6-31G\* or triple zeta 6-311G and 6-311G\* basis sets.

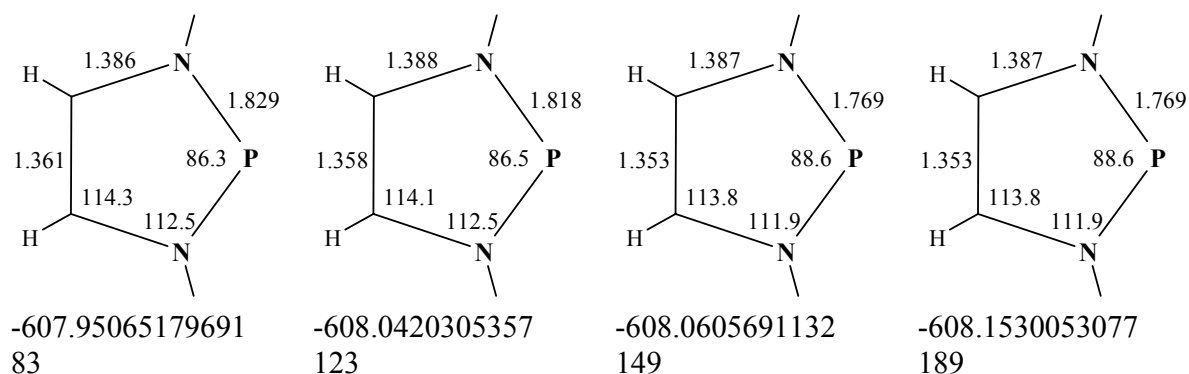

**Figure ESI 3.** Calculated heterocyclic bond lengths (Å), angles (°) and energies (Hartrees) of the model heterocyclic  $C_2H_2(NMe)_2P^+$  system at UB3LYP/6-31G, UB3LYP/6-311G and UB3LYP/6-31G\* and UB3LYP/6-311G\* levels (alongside the number of basis functions).

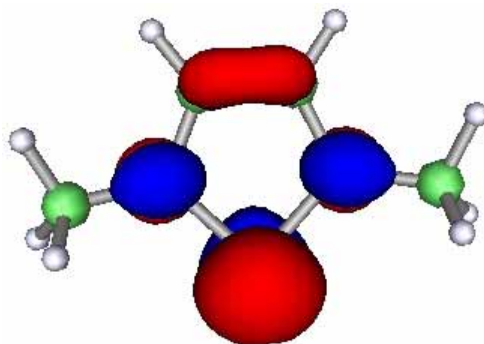

**Figure ESI 4.** SOMO of  $C_2H_2(NMe)_2P^+$  determined at the UB3LYP/6-311G\* level.

The RHF  $[(CH)_2(NMe)P]_2$  dimer (-1215.902403au) is slightly more stable than two UHF monomers  $[(CH)_2(NMe)P]$  (-1215.901303au).
